# Supplementary material for: The emerging neuroprotective roles of exerkines in Alzheimer’s disease
Source: PubMed Central journal article supplement (PMC9472554; doi:10.3389/fnagi.2022.965190), 2022-08-31
Supplement: Table_1.pdf [file Table_1.pdf]

**Table 1. Examples of exerkins that mediate the neurological effect of physical exercise**

| <b>Exerkine</b>   | <b>Type of molecule</b> | <b>Main tissue of origin</b> | <b>Main neurological action</b>                                                                           | <b>Clinical trials</b>                      | <b>References</b> |
|-------------------|-------------------------|------------------------------|-----------------------------------------------------------------------------------------------------------|---------------------------------------------|-------------------|
| IL-6              | cytokine                | skeletal muscle              | Modulates neuroinflammation                                                                               | NCT05040321                                 | 62                |
| Cathepsin B       | cysteine protease       | skeletal muscle              | Increases CNS BDNF and doublecortin, proteins involved in hippocampal neurogenesis and neuronal migration | NCT01315639                                 | 85; 86            |
| 3-Hydroxybutyrate | ketone body             | liver                        | Activates the BDNF gene promoter IV in cerebral cortical neurons                                          | NCT03690193;<br>NCT04466735;<br>NCT05028114 | 90; 91            |
| Lactate           | alpha-hydroxy acid      | skeletal muscle              | Promotes BDNF expression in the hippocampus by inducing the activation of Sirtuin1 deacetylase (SIRT1)    | NCT05207397;<br>NCT04299308;<br>NCT03999879 | 91; 97            |
| BDNF              | neurotrophin            | brain                        | Regulates neuronal differentiation and survival, synaptic integrity, brain plasticity and memory function | NCT05040217;<br>NCT02968875                 | 91; 98            |
| FNDC5/irisin      | myokine                 | skeletal muscle              | Induces CNS BDNF gene expression                                                                          | NCT03876314                                 | 104               |
